# Supplementary material
Source: MDPI journal article supplement (https://www.mdpi.com/2673-4834/1/1/6)
Supplement: s1 [file s1]

## Supporting Information

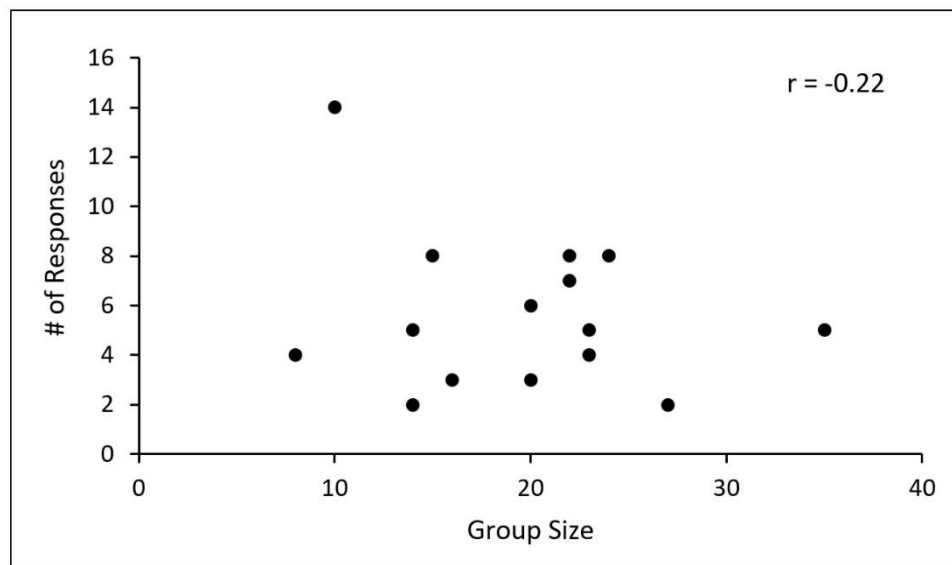

**Figure S1. Correlation plot (with Pearson correlation coefficient) of group size against the number of climate-related observations reported within each of 15 groups across the U.S.**

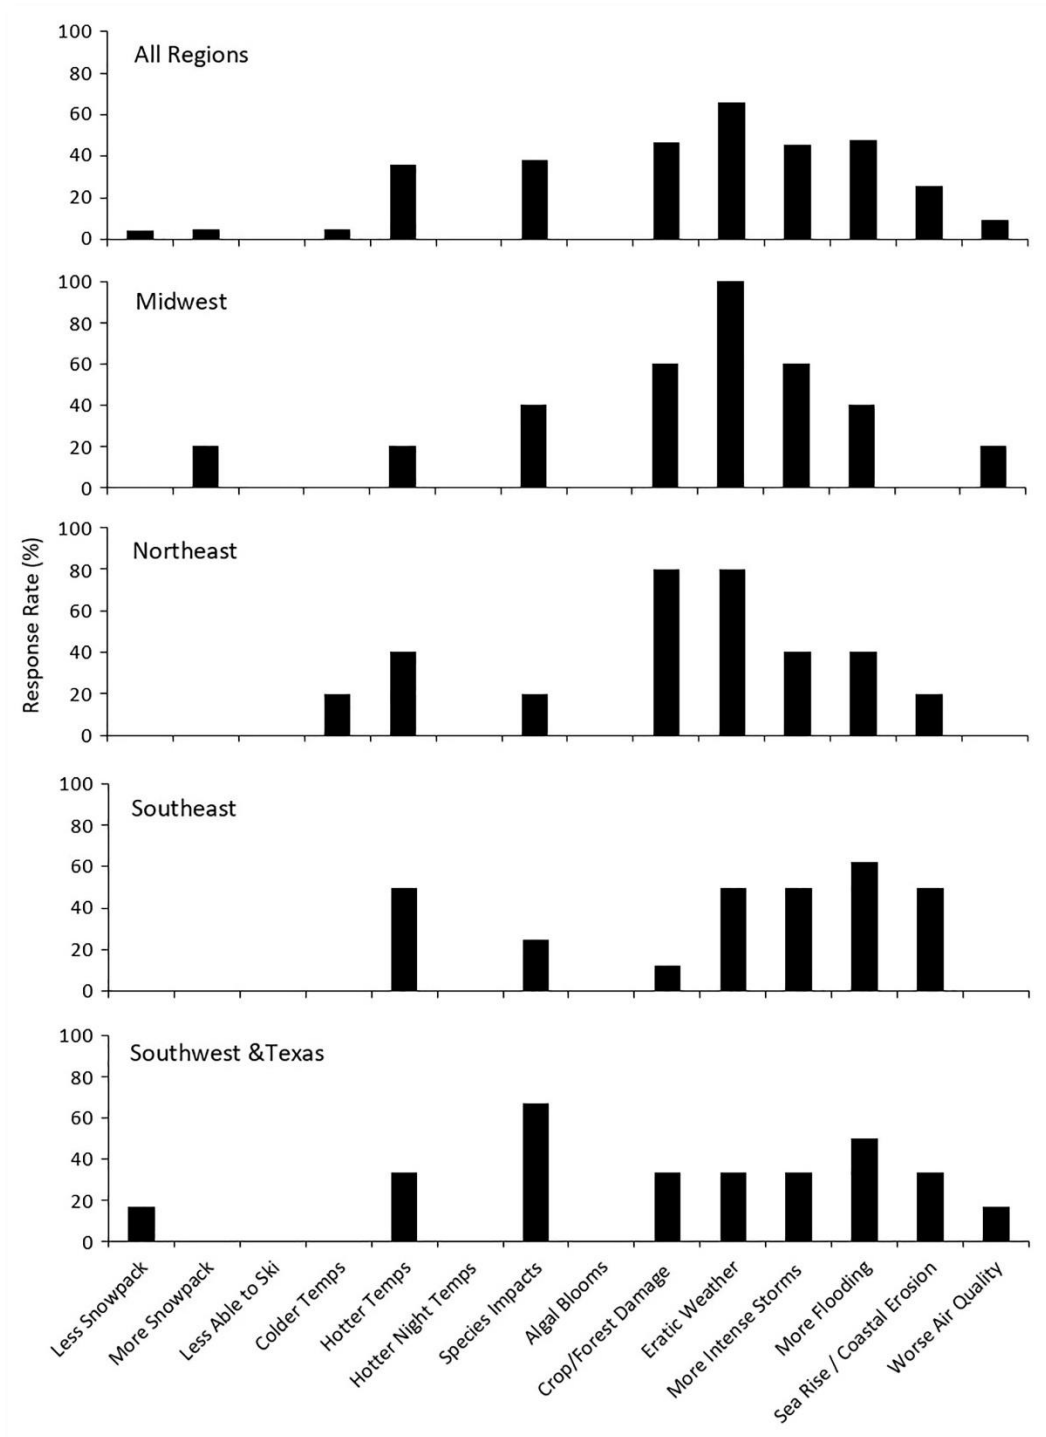

**Figure S2. Local climate-related impacts reported during one-on-one interviews with 24 separate community members across the country.**
